# Supplementary material for: Iron supported on bioinspired green silica for water remediation
Source: Royal Society of Chemistry journal article supplement (doi:10.1039/c6sc02937j), 2016-09-13
Supplement: c6sc02937j1.pdf [file c6sc02937j1.pdf]

## SUPPORTING INFORMATION

### Iron Supported On Bioinspired Green Silica for Water Remediation

Khalid M. Alotaibi, Lewis Shiels, Laure Lacaze, Tanya A. Peshkur, Peter Anderson, Libor Machala, Kevin Critchley, Siddharth V. Patwardhan and Lorraine T. Gibson

**Table S1:** ICP-MS concentration data recorded for heavy metals in river and tap water samples.

| <b>Metal</b>    | <b>River Water (ppb)<sup>b</sup></b> | <b>Tap water (ppb)<sup>b</sup></b> |
|-----------------|--------------------------------------|------------------------------------|
| Cr              | 4.3 ± 0.4                            | 14.3 ± 0.4                         |
| As              | 0.7 ± 0.1                            | 2.5 ± 0.1                          |
| Cd              | 5.5 ± 0.1                            | 12.7 ± 0.1                         |
| Ca <sup>a</sup> | 43,600 ± 1000                        | 11,500 ± 1000                      |
| Fe              | 60.1 ± 0.2                           | 249.9 ± 0.2                        |
| Mn              | 3.4 ± 0.1                            | 9.9 ± 0.1                          |
| Mg <sup>a</sup> | 6000 ± 1000                          | 8500 ± 1000                        |
| Pb              | 3.1 ± 0.1                            | 54.8 ± 0.1                         |
| Ni              | 12.0 ± 0.2                           | 50.4 ± 0.2                         |
| Zn              | 2.7 ± 1                              | 353.9 ± 1                          |
| Cu              | 12.0 ± 0.3                           | 60.3 ± 0.3                         |

<sup>a</sup> Measured by FAAS.

<sup>b</sup> Reported values are based on an average result of three experiments.

**Table S2:** Concentration ( $\mu\text{g cm}^{-3}$ ) of As(V) in filtered solutions, as measured by ICP-OES.

| <b>Sample</b>   | <b>Prior to sorbent addition</b> | <b>After sorbent addition</b> | <b>As(V) recovered</b> | <b>Recovery %</b> |
|-----------------|----------------------------------|-------------------------------|------------------------|-------------------|
| Distilled Water | 1.045                            | <0.005                        | 1.042                  | 99.68             |
| River water     | 1.075                            | <0.005                        | 1.052                  | 97.86             |
| Tap Water       | 1.041                            | <0.005                        | 1.000                  | 96.06             |

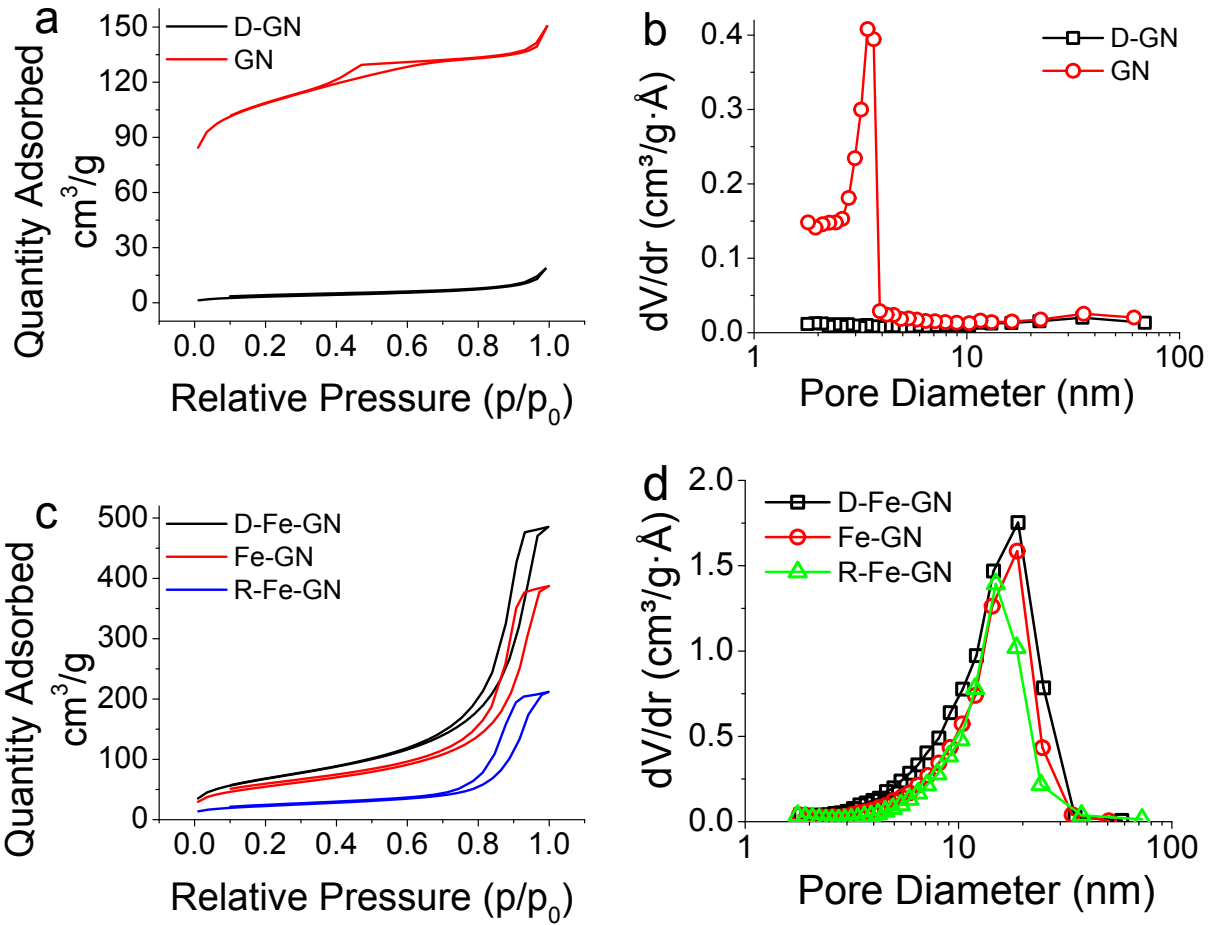

**Figure S1:** Nitrogen adsorption isotherms (a,c) and pore size distribution (b,d) for GN without (a,b) and with (c,d) iron.

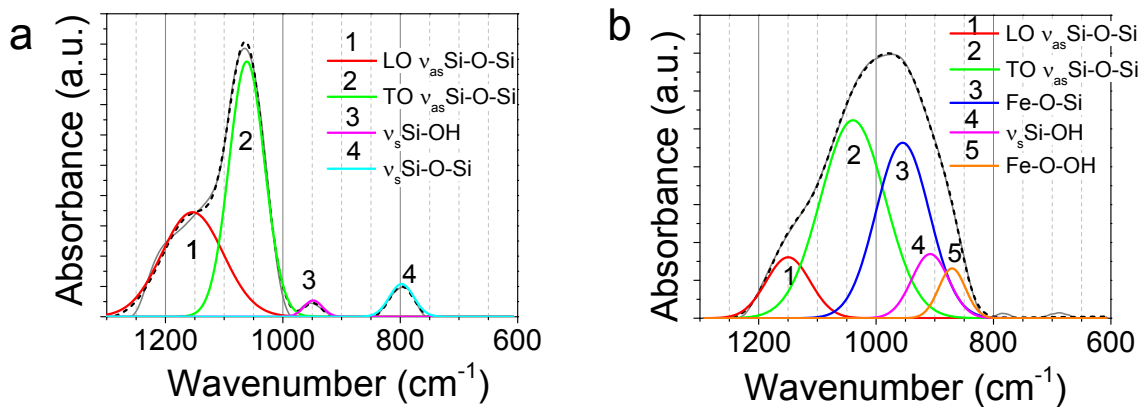

**Figure S2.** The deconvolution of  $\sim 1100\text{cm}^{-1}$  region for sample without (a) and with (b) iron. In the sample without iron (D-GN), the usual silica peaks were identified (**Figure S2a**), which included asymmetric Si-O-Si stretching modes at  $\sim 1150\text{cm}^{-1}$  and  $\sim 1060\text{cm}^{-1}$  (transverse and longitudinal optic modes, TO and LO, respectively), symmetric Si-O-Si stretching modes at  $\sim 800\text{cm}^{-1}$  and silanol (Si-OH) bonds at  $\sim 950\text{cm}^{-1}$ .
